# Supplementary material for: Copper Hexacyanoferrate Thin Film Deposition and Its Application to a New Method for Diffusion Coefficient Measurement
Source: MDPI journal article supplement (doi:10.3390/nano11071860), 2021-07-19
Supplement: s1 [file s1]

## Supplementary Materials

### Copper hexacyanoferrate thin film deposition and its characterization in micro-electrochemical device

Jeonghun Yun <sup>1</sup>, Yeongae Kim <sup>1</sup>, Caitian Gao <sup>1</sup>, Moobum Kim <sup>1</sup>, Jae Yoon Lee <sup>1,2</sup>, Chul-Ho Lee <sup>2</sup>, Tae-Hyun Bae <sup>3</sup> and Seok Woo Lee <sup>1,\*</sup>

<sup>1</sup> School of Electrical and Electronic Engineering, Nanyang Technological University, Singapore, 639798, Singapore

<sup>2</sup> KU-KIST Graduate School of Converging Science and Technology, Korea University, Seoul 02841, Republic of Korea

<sup>3</sup> Department of Chemical and Biomolecular Engineering, Korea Advanced Institute of Science and Technology, Daejeon, 34141, Republic of Korea

\* Correspondence: sw.lee@ntu.edu.sg

#### Mass analysis

We measured the mass change upon the transformation from copper to CuHCF<sub>e</sub> using microbalance (XP26, Mettler Toledo). There was 106  $\mu\text{g}$  increment when 2 cm (width)  $\times$  1 cm (length)  $\times$  and 20 nm (thickness) of copper film was dipped into a ferricyanide solution. From the dimension, the mass of copper film is 35.84  $\mu\text{g}$  and the mole of copper film is 0.564  $\mu\text{mol}$ . The molecular weight of hexacyanoferrate ( $\text{Fe}(\text{CN})_6$ ) is 211.95 g/mol. Theoretical weight increment after transforming is 119.5  $\mu\text{g}$  (0.564  $\mu\text{mol} \times 211.95$  g/mol). We think that the different between measured and theoretical values comes from measurement error and incorrect dimension of film. The actual copper film should be smaller than 2 cm (width)  $\times$  1 cm (length) because we cut the copper deposited glass using a blading saw (ADT 7120, Advanced Dicing Technologies). The mass analysis verifies the transforming CuHCF<sub>e</sub> film from copper.

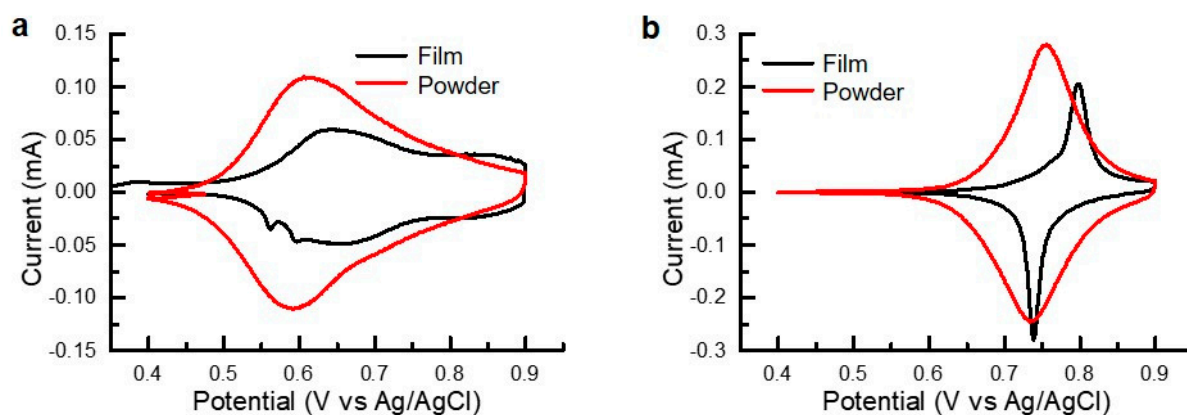

**Figure S1.** CV curves of the CuHCF<sub>e</sub> thin film and CuHCF<sub>e</sub> powder synthesized by co-precipitation: (a) 1 M NaCl and (b) 1 M KCl.

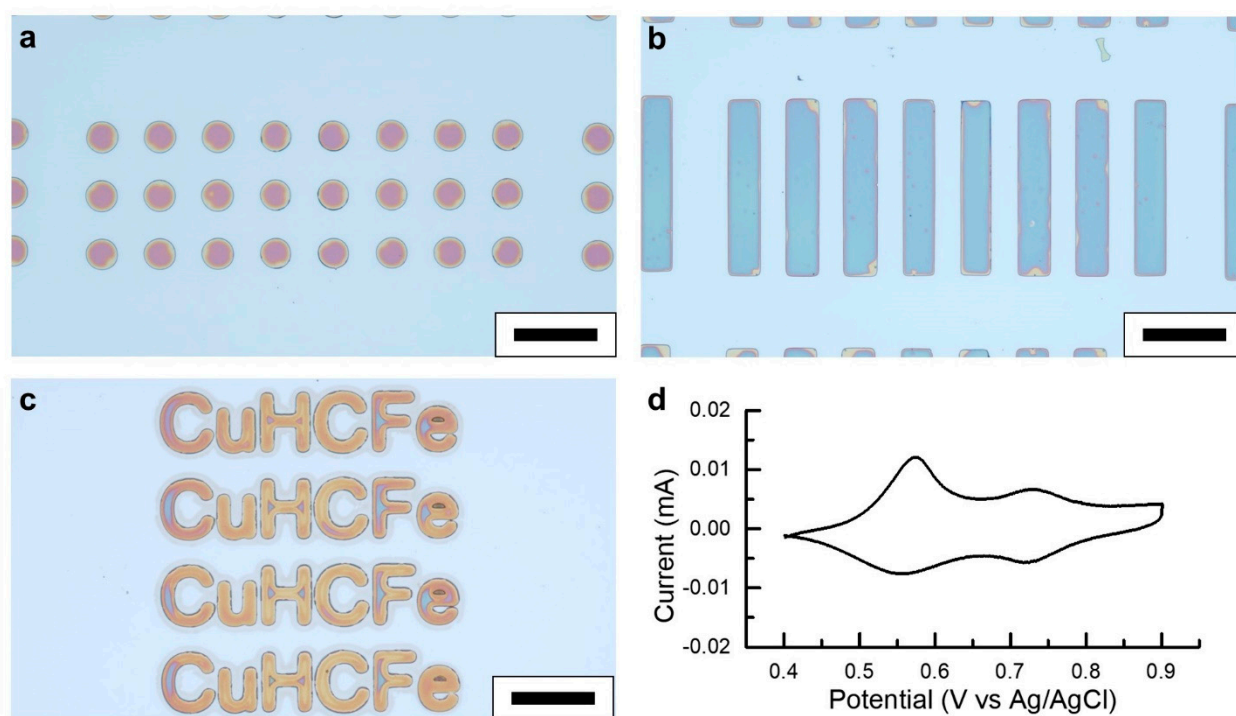

**Figure S2.** Optical microscope images of patterned CuHCF film: (a) dot, (b) line, and (c) letter of CuHCFe. Scale bar: 100 μm. (d) CV curve of dot-patterned CuHCF film in 1 M NaCl.

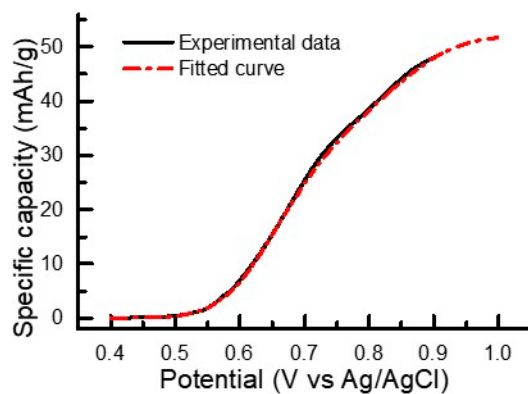

**Figure S3.** Specific capacity of a CuHCF thin film in 1 M NaCl electrolyte and fitted curve.  $f(V)$  was a polynomial of degree 5 because polynomials of degree up to 4 were unable to represent the data at the end of the graph well. The error caused large difference of calculated current. In here,  $f(V)$  is  $-574.69 \cdot V^5 + 2273.8 \cdot V^4 - 3407.3 \cdot V^3 + 2404.3 \cdot V^2 - 773.67 \cdot V + 82.72$ .

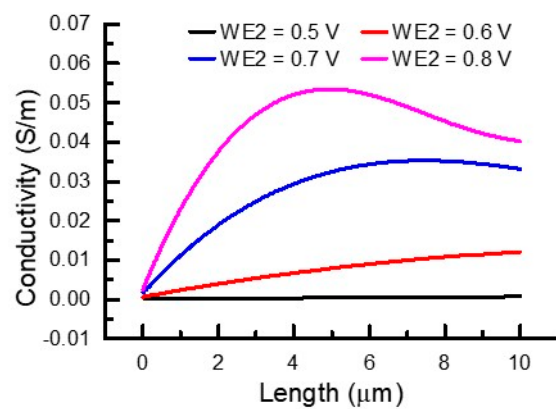

**Figure S4.** Calculated conductivity ( $\sigma_0 \cdot |\partial C / \partial x|$ ) along x-axis.
